# Supplementary material for: Filling carbon: a microstructure-engineered hard carbon for efficient alkali metal ion storage
Source: Royal Society of Chemistry journal article supplement (doi:10.1039/d3ee01154b), 2023-01-01
Supplement: d3ee01154b1.pdf [file d3ee01154b1.pdf]

*Supporting Information for:*

**Filling carbon: a microstructure-engineered hard carbon for efficient  
alkali metal-ion storage**

**Experimental methods**

**Chemical vapor deposition (CVD).** The activated carbon (AC) (YEC-8A) and purchased mesoporous carbon CMK-3 were used as templates without further modification. Typically, a certain of AC was spread evenly over the bottom of the Al<sub>2</sub>O<sub>3</sub> boat. Then the boat was placed inside a tube furnace and heated to 700 °C with a heating ramp rate of 10 °C min<sup>-1</sup> under Ar condition as the gas carrier in a flow rate of 100 SCCM. And then CVD step was carried out at 700 °C for various residence time of 0, 40 min, 1 h, and 3 h while introducing a certain flow rate of benzene vapor. The as-obtained products were denoted as AC, FC-40min, FC-1h, and FC-3h, respectively. In addition, CMK-3 was also been used as templates with the same procedure while the residence time was prolonged to 0, 6, 9, and 12 h, and the as-obtained samples were denoted as CMK-3, CMK-3-6h, CMK-3-9h, and CMK-3-12h, respectively. To investigate the influence of carbon sources, benzene was replaced by ethyne, methyl ethyl sulfide, toluene, thiophene, and pyridine, and the other conditions remain unchanged.

**Post-heat treatment.** To further adjust the microstructures of the filling carbon (FC) samples, FC-3h was further post-heat treated at 1100, 1300, and 1500 °C for 2 h under an Ar atmosphere with a ramp rate of 1 °C min<sup>-1</sup>. The obtained carbon materials were denoted as FC-3h-1100, FC-3h-1300, and FC-3h-1500, respectively. To exclude the influence of post-heat treatment on the template, AC was also heat treated at 1300 °C

for 2 h and denoted as AC-1300.

**Materials characterization.** The morphologies of samples were observed by scanning electron microscopy (SEM) (ULTRA/PLUS, ZEISS) and high-resolution transmission electron microscopy (HRTEM) (FEI TF20). The crystal phases were analyzed by X-ray diffraction (XRD) (Rigaku SmartLab SE; Rigaku) with Cu K $\alpha$  radiation ( $\lambda = 0.15406$  nm) and Raman spectroscopies (DXR2; Thermo Fisher Scientific) with a laser wavelength of 532 nm. The porous textures were characterized by adsorption-desorption measurements (iPore 400), true density analysis (iPyc10), and the small angle X-ray scattering (SAXS) technique. The N<sub>2</sub> and CO<sub>2</sub> adsorption-desorption isotherm were respectively obtained at 77 K and 273 K and analyzed by the density functional theory (DFT) method to obtain the open pore size distribution. The specific surface area was calculated based on the N<sub>2</sub> adsorption isotherm by using the Brunauer–Emmett–Teller (BET) method. The true density was measured by using the He replacement method due to the ultra-small aerodynamic diameter of the He molecule to derive the closed pore volume. The SAXS profiles were collected on a Rigaku 3.5 m NANOPIX system equipped with a Cu k $\alpha$  radiation source using the transmission method. The data were fitted by using a Nano Solver software assuming a cylinder model to obtain the average pore diameter.

**Electrochemical Measurement.** The electrochemical performances of carbon materials were examined using CR2032-coin cells assembled in an argon-filled glove box. Na, K, or Li foil and glass fiber (GF/F, whatman) were used as counter electrodes and separators for sodium, potassium, and lithium batteries, respectively. The electrolyte was 1 M NaPF<sub>6</sub> in diethylene glycol dimethyl for Na half-cells, 1M LiPF<sub>6</sub> in ethylene carbonate/ethyl methyl carbonate /dimethyl carbonate (1:1:1 by volume) for Li half-cells, and 1 M KPF<sub>6</sub> in ethylene carbonate/diethyl carbonate (1:1 by volume) K half-cells. The working electrodes were prepared by mixing active materials, polyacrylic acid (PAA), and Super P (8:1:1 by weight) in deionized water to form a homogenous slurry. The slurry was spread on a Cu foil and dried at 100 °C for 12 h under vacuum and then punched into small disks with a diameter of 12 mm and mass

loading of  $\sim 1.5 \text{ mg cm}^{-2}$ . Sodium and potassium storage performance was examined in a galvanostatic charge-discharge mode in the potential range of 0.002-3 V at a current density of  $20 \text{ mA g}^{-1}$  using a battery test system. The lithium storage performance was tested in the constant-current/constant-potential (CC/CP) mode at a current density of  $20 \text{ mA g}^{-1}$  with a cutoff voltage of 0.005 V and then discharged to  $4 \text{ mA g}^{-1}$ . The slow scan rate cycling voltammetry (CV) measurements were carried out in the potential range of 0.002-1.5 V versus Na/Na<sup>+</sup> at a scan rate of  $0.01 \text{ mV s}^{-1}$  using an IviumNstat electrochemical workstation.

**Operando Analysis.** The work electrodes were composed of 90 wt.% active materials and 10 wt.% polytetrafluoroethylene (PTFE) without any conductive carbon. Operando analysis was performed in a special in-situ cell with a beryllium window for XRD analysis and a quartz plate for Raman analysis as an optical window. The in-situ cells were tested in the potential range of 0.002-2 V at a constant current density of  $20 \text{ mA g}^{-1}$  for XRD analysis and  $50 \text{ mA g}^{-1}$  for Raman analysis.

**Computational details.** All calculations were implemented in the framework of the spin-polarized density functional theory (DFT) with generalized gradient approximation (GGA)<sup>1</sup> and Perdew-Burke-Ernzerhof (PBE)<sup>2</sup> exchange functional. Vienna Abinitio Simulation Package (VASP)<sup>3, 4</sup> with the projector augmented wave (PAW)<sup>5</sup> method was employed in DFT calculations. For structure optimization, the cutoff energy of plane-wave basis set and Monkhorst-Pack k-points meshes were set as 450 eV and  $2 \times 2 \times 1$ . In addition, the self-consistent convergence accuracy was set as  $1 \times 10^{-6} \text{ eV/atom}$ , while the convergence criterion for the force between atoms was  $1 \times 10^{-2} \text{ eV/\AA}$ .

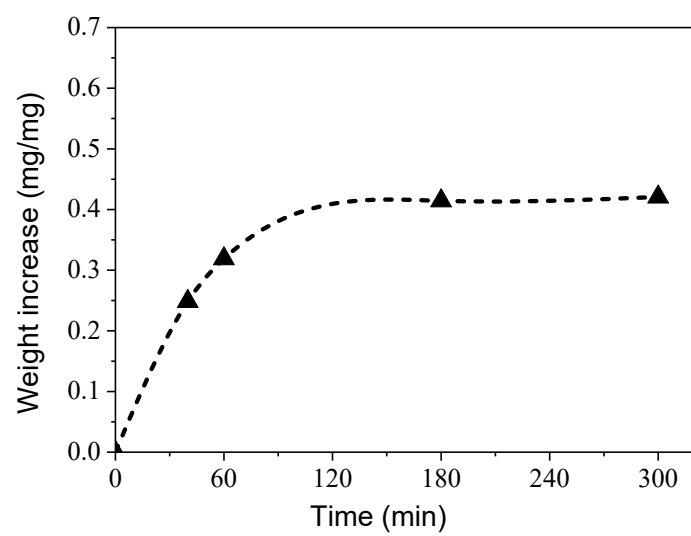

**Fig. S1** The weight increase of AC during the CVD treatment.

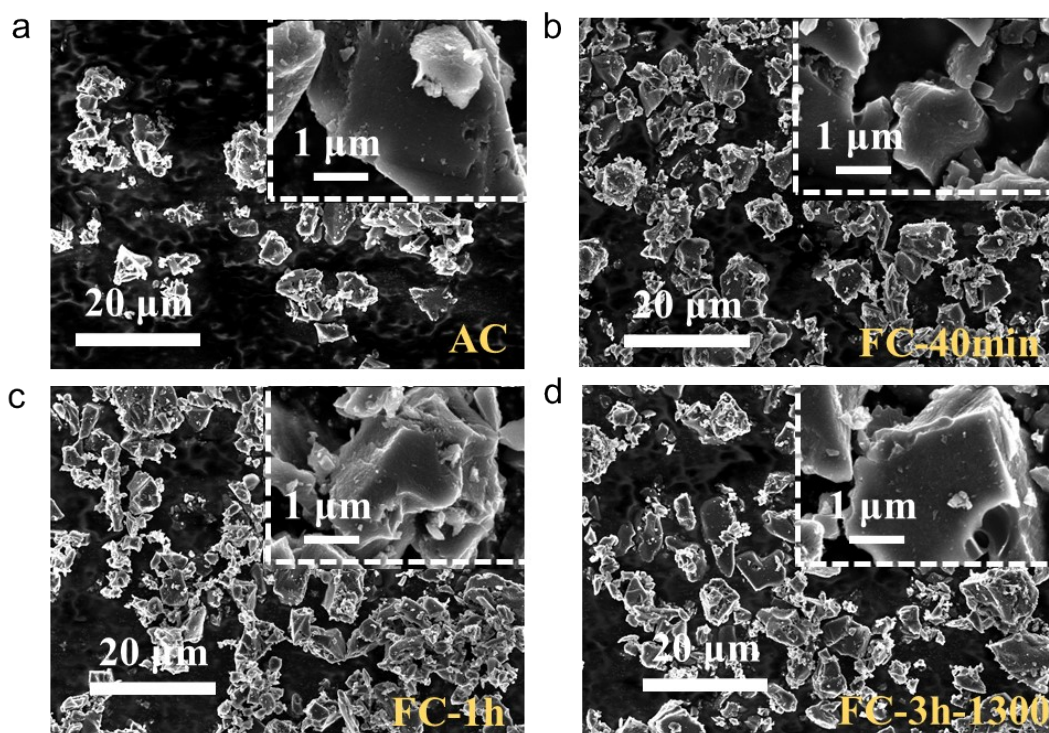

**Fig. S2** The SEM images of FC samples. SEM images of (a) AC, (b) FC-40min, (c) FC-1h, and (d) FC-3h-1300 samples.

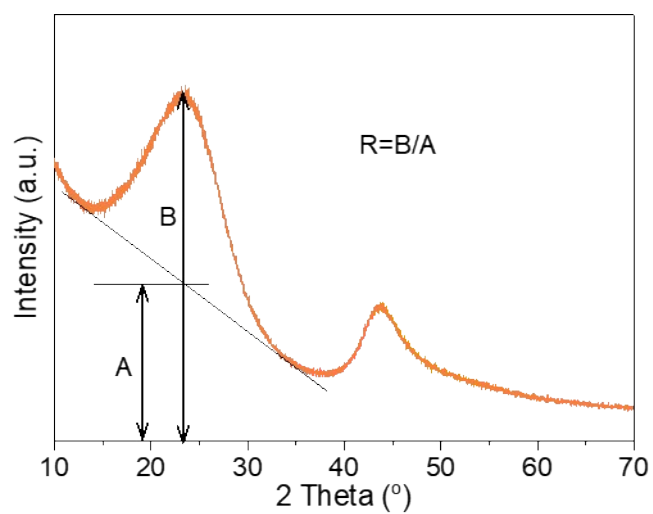

**Fig. S3** Schematic representation of the definition of the parameter R used to empirically estimate the fraction of single-layers in hard carbon samples.

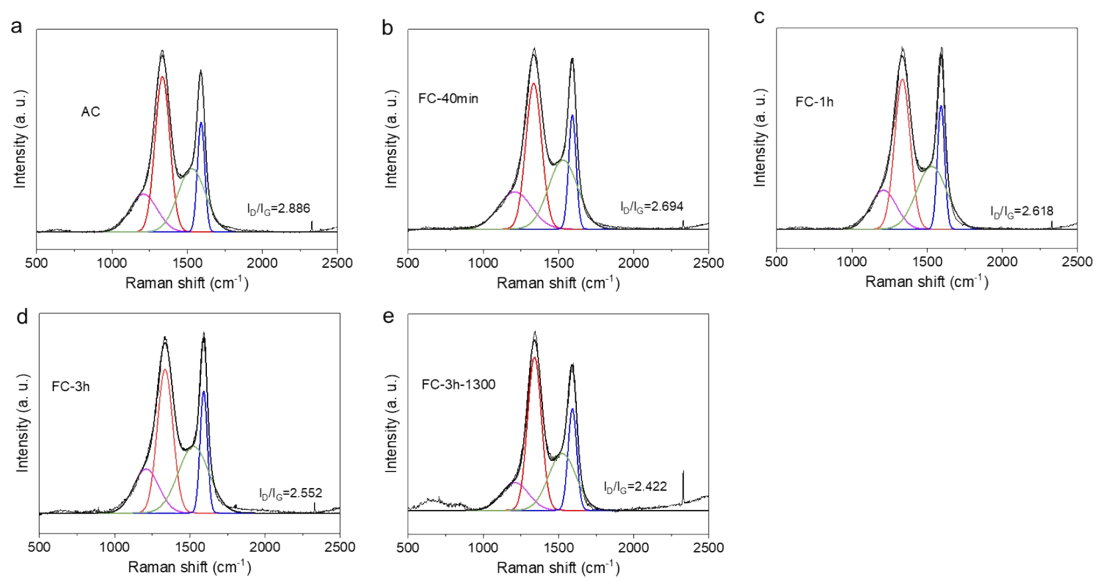

**Fig. S4** The fitting results of Raman spectra of FC samples. The fitting results of Raman spectra of (a) AC, (b) FC-40min, (c) FC-1h, (d) FC-3h, and (e) FC-3h-1300 samples.

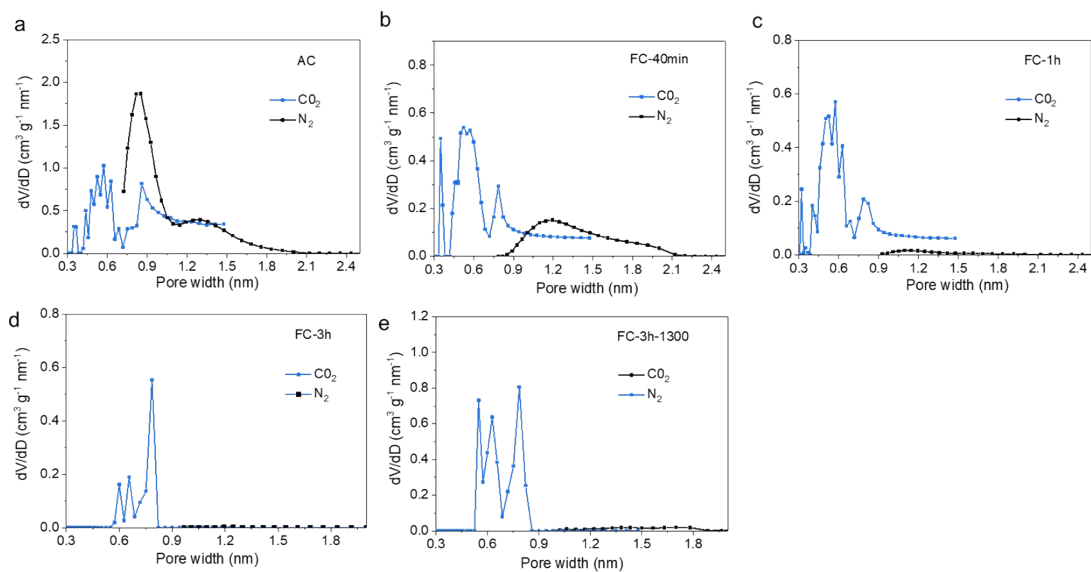

**Fig. S5** The open pore size distributions of FC samples. The pore size distributions of (a) AC, (b) FC-40min, (c) FC-1h, (d) FC-3h, and (e) FC-3h-1300 samples obtained by fitting the  $N_2$  and  $CO_2$  adsorption isotherms.



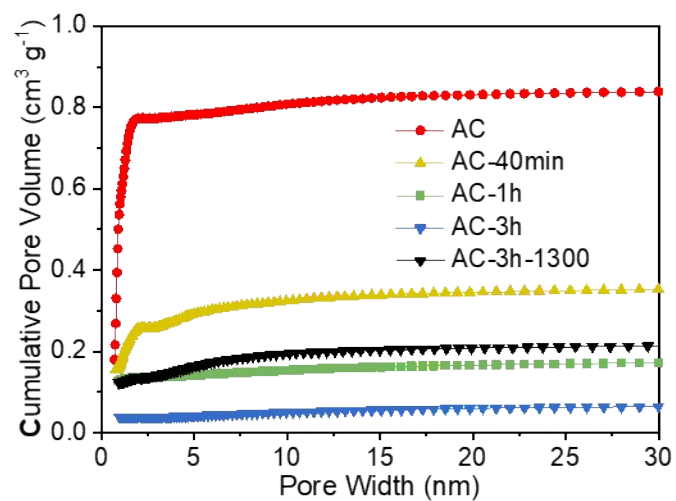

**Fig. S6** The cumulative diagram of pore size distribution.

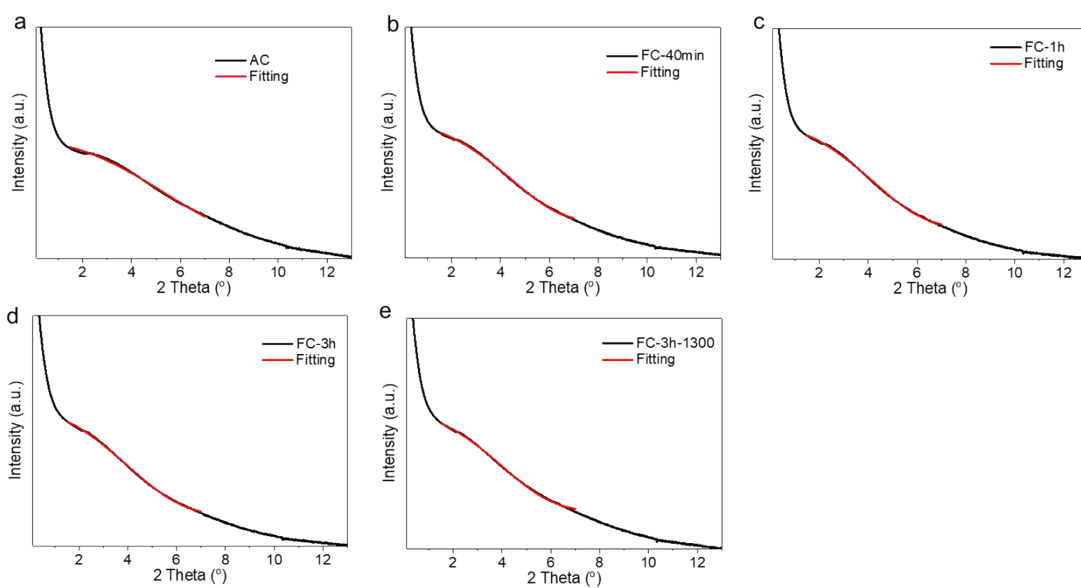

**Fig. S7** The fitting results of SAXS patterns of FC samples. The fitting results of SAXS patterns of (a) AC, (b) FC-40min, (c) FC-1h, (d) FC-3h, and (e) FC-3h-1300 samples.

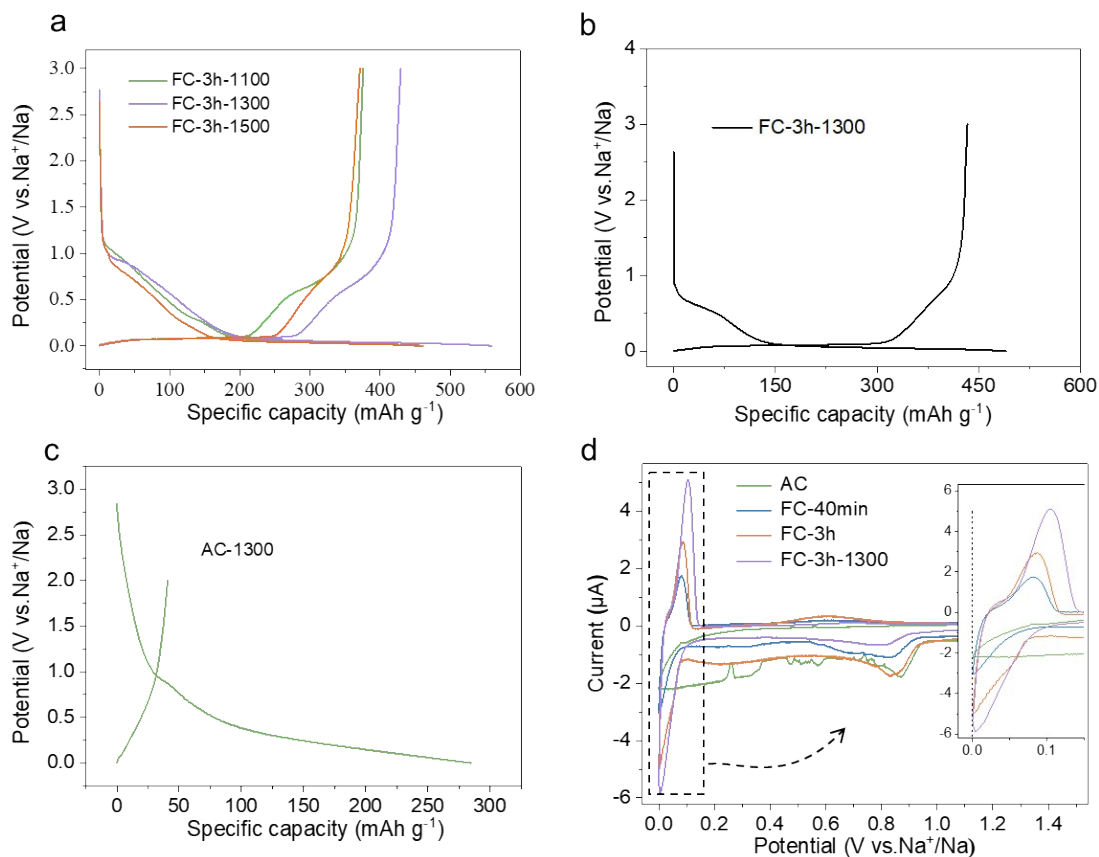

**Fig. S8** Sodium ions storage behaviors of FC electrodes. (a) The initial discharge-charge profiles of FC-3h-1100, FC-3h-1300, and FC-3h-1500 electrodes at a current density of 20 mA g<sup>-1</sup>. (b) The initial discharge-charge profiles of FC-3h-1300 without conductive carbon black at a current density of 20 mA g<sup>-1</sup>. The FC-3h-1300 electrode was prepared with active material and polyacrylic acid (PAA) (9:1 by weight) to exclude the influence of Super P on the ICE. (c) The initial discharge-charge profiles of AC-1300 electrode at a current density of 20 mA g<sup>-1</sup>. (d) The initial CV profiles of the AC and FC samples at a slow scan rate of 0.01 mV s<sup>-1</sup>.

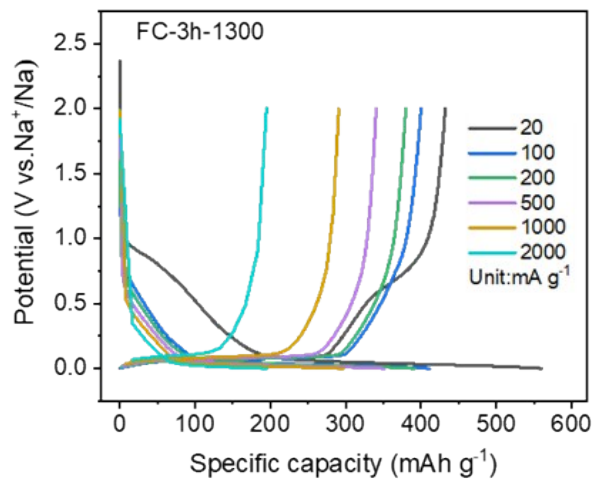

**Fig. S9** The discharge/charge curves of the FC-3h-1300 electrode for sodium-ion batteries at different current densities.

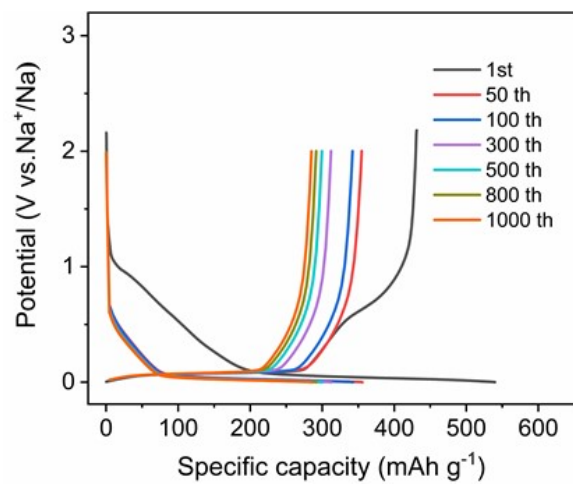

**Fig. S10** The discharge/charge curves of the FC-3h-1300 electrode at different cycles for sodium-ion batteries.

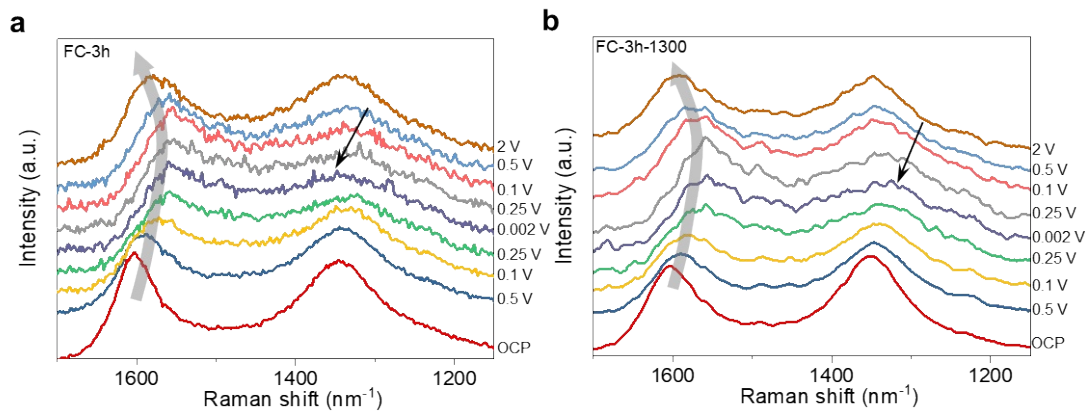

**Fig. S11** In situ Raman studies of the FC electrodes. Evolution of Raman spectra of (a) FC-3h and (b) FC-3h-1300 electrodes collected in operando mode at different discharge and charge states.

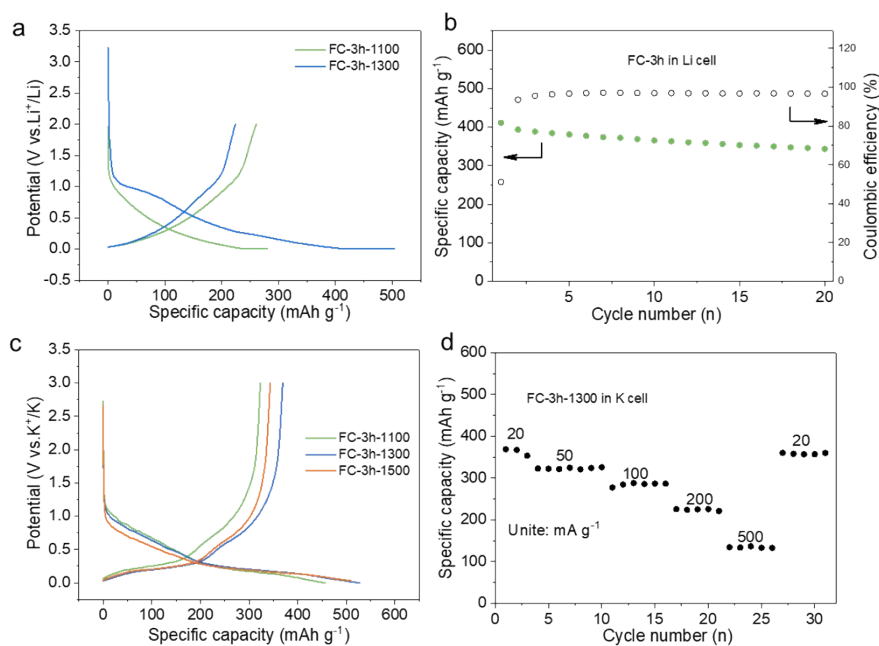

**Fig. S12** Lithium and potassium ion storage behaviors of FC electrodes. (a) The initial charge-discharge curves of FC-3h-1100 and FC-3h-1300 electrodes in Li half-cells at a current density of 20 mA g<sup>-1</sup> with a cutoff voltage of 0.005 V and then discharged at 0.005 V to 4 mA g<sup>-1</sup>. (b) The cycling performance of FC-3h electrode in CC/CV mode in Li half-cells. (c) The initial discharge-charge profiles of FC-3h-1100, FC-3h-1300, and FC-3h-1500 electrodes at a current density of 20 mA g<sup>-1</sup> in K half-cells. (d) The rate performance of FC-3h-1300 electrodes at various current densities in K half-cells.

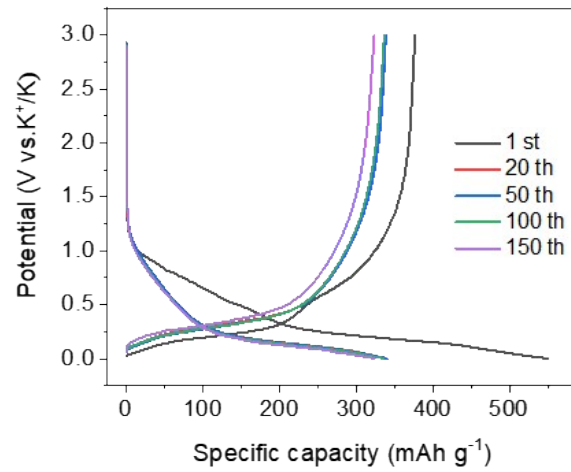

**Fig. S13** The discharge-charge curve of FC-3h-1300 electrode at different cycles for potassium-ion batteries.



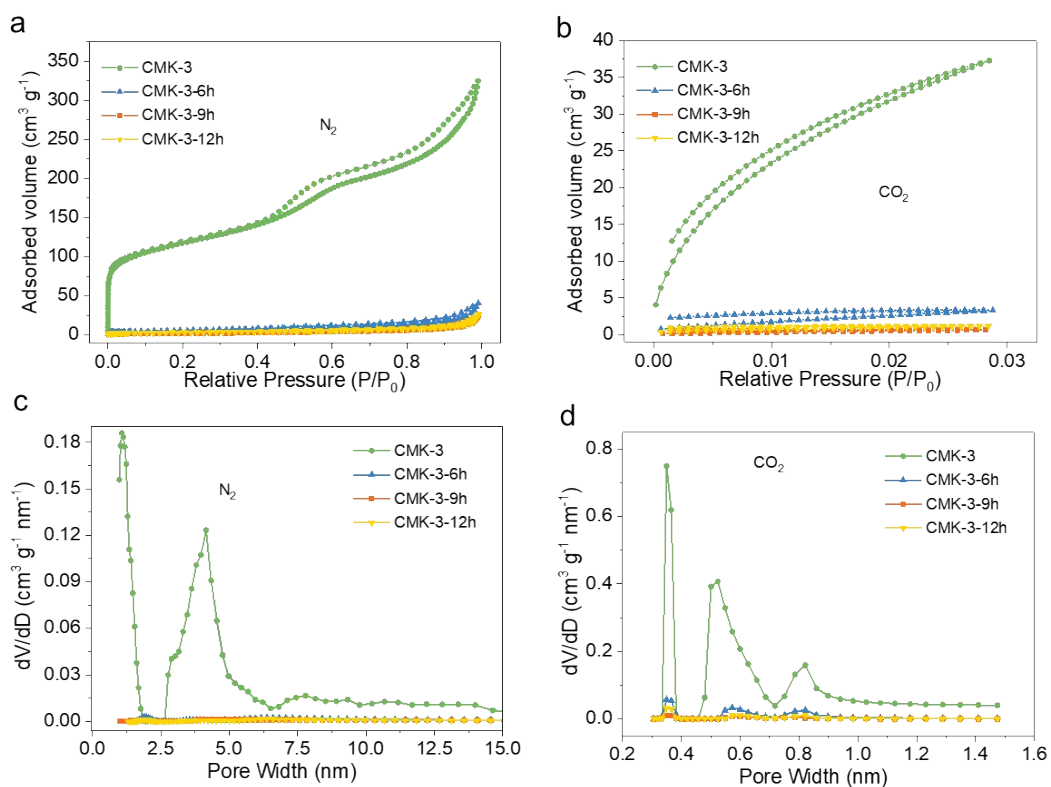

**Fig. S14** The open pore structures of the CMK-3 and CVD-treated CMK-3. The (a) N<sub>2</sub> and (b) CO<sub>2</sub> adsorption-desorption isotherms and (c), (d) the corresponding pore size distributions of CVD-treated CMK-3.

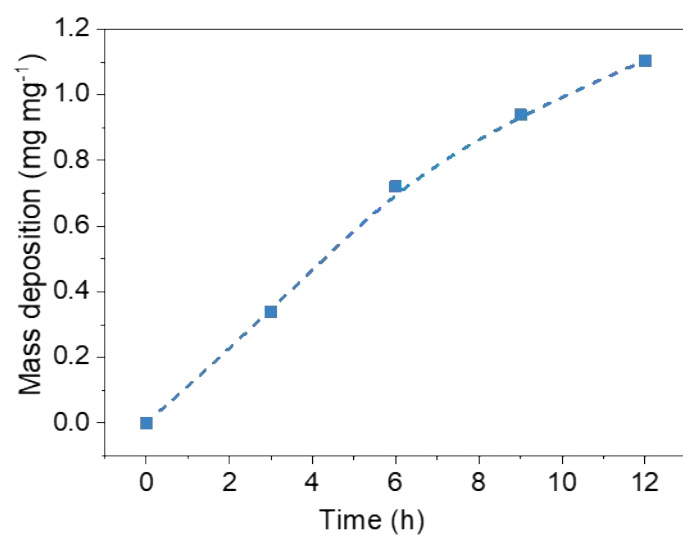

**Fig. S15** The weight increase of CMK-3 during the CVD treatment.

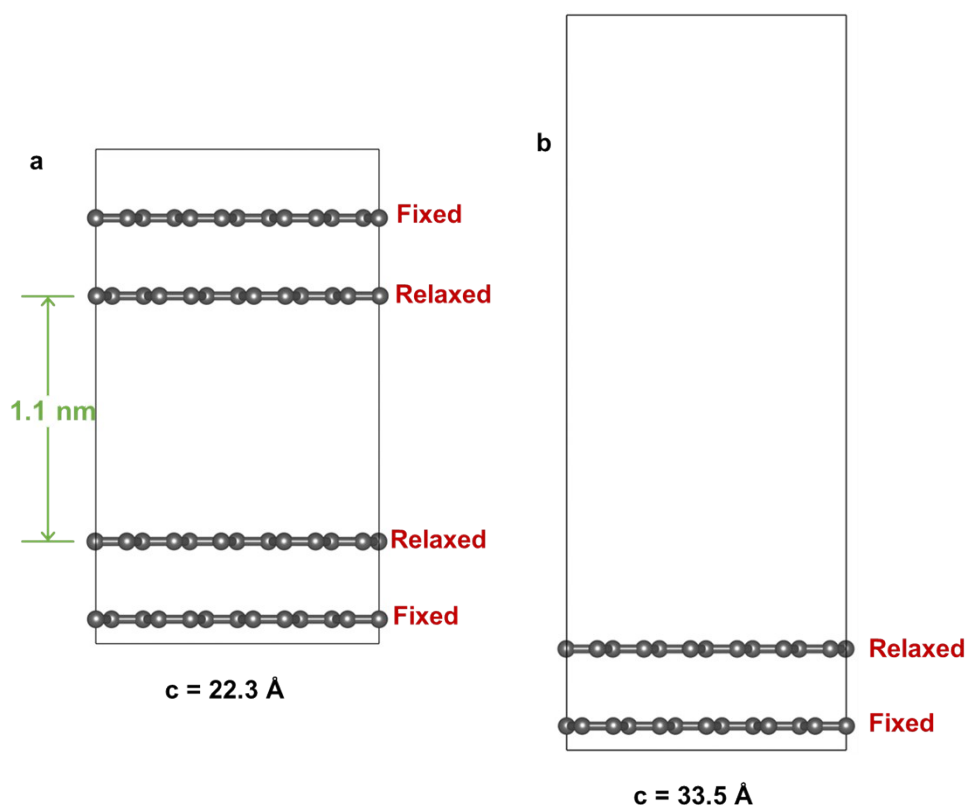

**Fig. S16** Slab models for DFT calculations. The (a) space-confined configuration and (b) open configuration.

**Table S1.** Comparison of the electrochemical performance of different carbon anode materials for SIBs.

| Materials                                | ICE [%] | Reversible capacity [mAh g <sup>-1</sup> ]/current density [mA g <sup>-1</sup> ] | Cycling stability [mAh g <sup>-1</sup> ]                                                                     | Refs.     |
|------------------------------------------|---------|----------------------------------------------------------------------------------|--------------------------------------------------------------------------------------------------------------|-----------|
| Sieving carbons                          | 81      | 430/50                                                                           | 390 at 50 mA g <sup>-1</sup> for 100 cycles (93%)                                                            | 6         |
| Coal-derived HC                          | 82      | 308.4/30                                                                         | 215.5 at 90 mA g <sup>-1</sup> for 800 cycles (85.1%)                                                        | 7         |
| Pitch-derived carbon                     | 80      | 263/40                                                                           | 184 at 40 mA g <sup>-1</sup> for 500 cycles (70%)                                                            | 8         |
| Cherry petals-derived carbon             | 67      | 310.2/20                                                                         | 131.5 at 500 mA g <sup>-1</sup> for 500 cycles (89.8%)                                                       | 9         |
| Phenol-formaldehyde resin derived carbon | 84      | 410/30                                                                           | 381 at 30 mA g <sup>-1</sup> for 40 cycles (93%)                                                             | 10        |
| Waste cork derived HC                    | 81      | 358/30                                                                           | 312 at 30 mA g <sup>-1</sup> for 200 cycles (87%)                                                            | 11        |
| Hard-soft composite carbon               | 80      | 282/30                                                                           | 191 at 150 mA g <sup>-1</sup> for 100 cycles (74%)                                                           | 12        |
| Pitch derived carbon                     | 72      | 289/30                                                                           | 270.1 at 30 mA g <sup>-1</sup> for 100 cycles (93.7%)                                                        | 13        |
| FC-3h-1300                               | 88.4    | 435.5/20                                                                         | 413.1 at 50 mA g <sup>-1</sup> for 100 cycles (99%)<br>284.0 at 500 mA g <sup>-1</sup> for 1000 cycles (80%) | This work |

**Table S2.** Comparison of the electrochemical performance of different carbon anode materials for KIBs.

| Materials                                             | ICE [%] | Reversible capacity [mAh g <sup>-1</sup> ] /current density [mA g <sup>-1</sup> ] | Cycling stability [mAh g <sup>-1</sup> ]                | Refs.     |
|-------------------------------------------------------|---------|-----------------------------------------------------------------------------------|---------------------------------------------------------|-----------|
| Pitch derived carbon                                  | 65      | 296/27.9                                                                          | 296 at 27.9 mA g <sup>-1</sup> for 50 cycles (93.2%)    | 14        |
| Hard-soft composite carbon                            | 67      | 261/27.9                                                                          | 200 at 279 mA g <sup>-1</sup> for 200 cycles (93%)      | 15        |
| Amorphous ordered mesoporous carbon                   | 63.6    | 307.4/50                                                                          | 146.5 at 1000 mA g <sup>-1</sup> for 1000 cycles (70%)  | 16        |
| Hollow nanostructured N-doped carbon                  | 37.92   | 301.8/100                                                                         | 254 at 100 mA g <sup>-1</sup> for 100 cycles (84.2%)    | 17        |
| N/S/O-tridoped HC                                     | 31.6    | 237.8/50                                                                          | 209.6 at 50 mA g <sup>-1</sup> , 100 cycles, (88.1%)    | 18        |
| Nitrogen-doped and partially graphitized hard carbons | 34.8    | 269.3/50                                                                          | 137.6 at 500 mA g <sup>-1</sup> for 1000 cycles (63.2%) | 19        |
| Carbon spheres                                        | 52.0    | 239.6/100                                                                         | 140.2 at 2000 mA g <sup>-1</sup> for 500 cycles (65.8%) | 20        |
| MXene-bonded HC film                                  | 40      | 280.6/30                                                                          | 210 at 50 mA g <sup>-1</sup> for 100 cycles (84%)       | 21        |
| FC-3h-1300                                            | 68.4    | 376.6/20                                                                          | 322.7 at 50 mA g <sup>-1</sup> for 150 cycles (96.9%)   | This work |

## Supplementary references

- 1 J. P. Perdew and Y. Wang, *Phys. Rev. B*, 1992, **45**, 13244-13249.
- 2 J. P. Perdew, K. Burke and M. Ernzerhof, *Physical Review Letters*, 1996, **77**, 3865-3868.
- 3 G. Kresse and J. Hafner, *Phys. Rev. B*, 1994, **49**, 14251-14269.
- 4 G. Kresse and J. Furthmüller, *Physical Review B*, 1996, **54**, 11169-11186.
- 5 P. E. Blöchl, *Physical Review B*, 1994, **50**, 17953-17979.
- 6 Q. Li, X. Liu, Y. Tao, J. Huang, J. Zhang, C. Yang, Y. Zhang, S. Zhang, Y. Jia, Q. Lin, Y. Xiang, J. Cheng, W. Lv, F. Kang, Y. Yang and Q.-H. Yang, *Natl. Sci. Rev.*, 2022, **9**, nwac084.
- 7 K. Wang, F. Sun, H. Wang, D. Wu, Y. Chao, J. Gao and G. Zhao, *Adv. Funct. Mater.*, 2022, **32**, 2203725.
- 8 Y. Qi, Y. Lu, F. Ding, Q. Zhang, H. Li, X. Huang, L. Chen and Y.-S. Hu, *Angew. Chem. Int. Ed.*, 2019, **58**, 4361.
- 9 Z. Zhu, F. Liang, Z. Zhou, X. Zeng, D. Wang, P. Dong, J. Zhao, S. Sun, Y. Zhang and X. Li, *J. Mater. Chem. A*, 2018, **6**, 1513-1522.
- 10 Q. Meng, Y. Lu, F. Ding, Q. Zhang, L. Chen and Y.-S. Hu, *ACS Energy Lett.*, 2019, **4**, 2608-2612.
- 11 Y. Li, Y. Lu, Q. Meng, A. C. S. Jensen, Q. Zhang, Q. Zhang, Y. Tong, Y. Qi, L. Gu, M.-M. Titirici and Y.-S. Hu, *Adv. Energy Mater.*, 2019, **9**, 1902852.
- 12 F. Xie, Z. Xu, A. C. S. Jensen, H. Au, Y. Lu, V. Araullo-Peters, A. J. Drew, Y.-S. Hu and M.-M. Titirici, *Adv. Funct. Mater.*, 2019, **29**, 1901072.
- 13 S. Liu, W. Shao, W. Zhang, T. Zhang, C. Song, M. Yao, H. Huang, X. Jian and F. Hu, *Nano Energy*, 2021, **87**, 106097.
- 14 Y. Liu, Y.-X. Lu, Y.-S. Xu, Q.-S. Meng, J.-C. Gao, Y.-G. Sun, Y.-S. Hu, B.-B. Chang, C.-T. Liu and A.-M. Cao, *Adv. Mater.*, 2020, **32**, 2000505.
- 15 Z. Jian, S. Hwang, Z. Li, A. S. Hernandez, X. Wang, Z. Xing, D. Su and X. Ji, *Adv. Funct. Mater.*, 2017, **27**, 1700324.
- 16 W. Wang, J. Zhou, Z. Wang, L. Zhao, P. Li, Y. Yang, C. Yang, H. Huang and S. Guo, *Adv. Energy Mater.*, 2018, **8**, 1701648.
- 17 W. Hong, Y. Zhang, L. Yang, Y. Tian, P. Ge, J. Hu, W. Wei, G. Zou, H. Hou and X. Ji, *Nano Energy*, 2019, **65**, 104038.
- 18 M. Chen, Y. Cao, C. Ma and H. Yang, *Nano Energy*, 2021, **81**, 105640.
- 19 J. Hu, Y. Xie, M. Yin and Z. Zhang, *J. Energy Chem.*, 2020, **49**, 327-334.
- 20 X. Han, T. Chen, P. Zhang, Y. Qi, P. Yang, Y. Zhao, M. Shao, J. Wu, J. Weng, S. Li and F. Huo, *Adv. Funct. Mater.*, 2022, **32**, 2109672.
- 21 N. Sun, Q. Zhu, B. Anasori, P. Zhang, H. Liu, Y. Gogotsi and B. Xu, *Adv. Funct. Mater.*, 2019, **29**, 1906282.
